# Supplementary material for: A new approach to the synthesis of legionaminic acid analogues
Source: Royal Society of Chemistry journal article supplement (doi:10.1039/c8ra07771a), 2018-01-01

## Supplementary Material

### A new approach to the synthesis of legionaminic acid analogues

James R Carter & Milton J Kiefel

This Supplementary Material contains selected  $^1\text{H}$  &  $^{13}\text{C}$  spectra of synthesised compounds

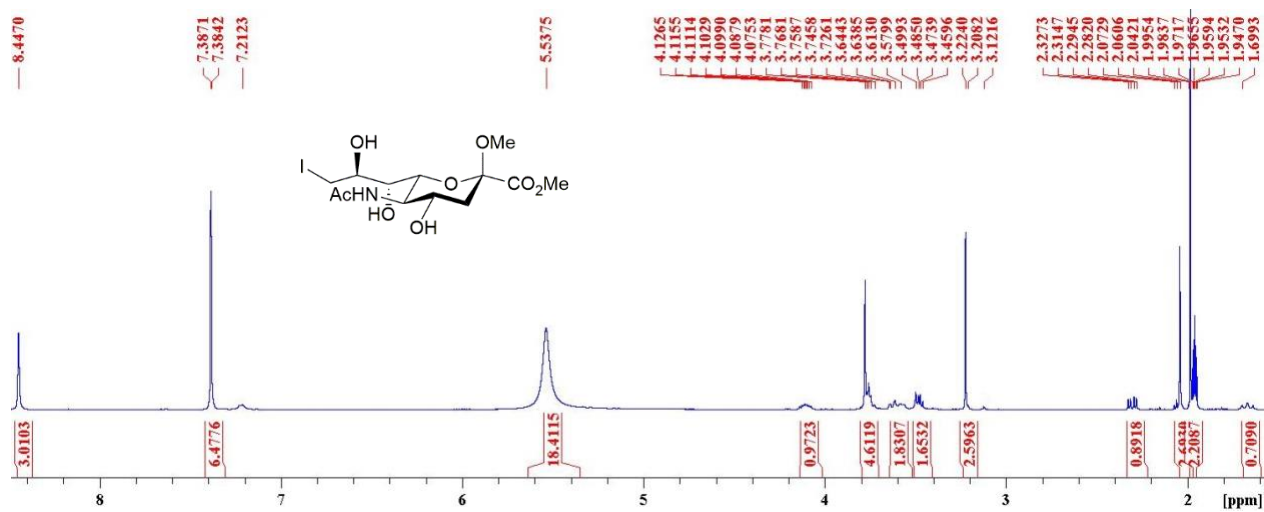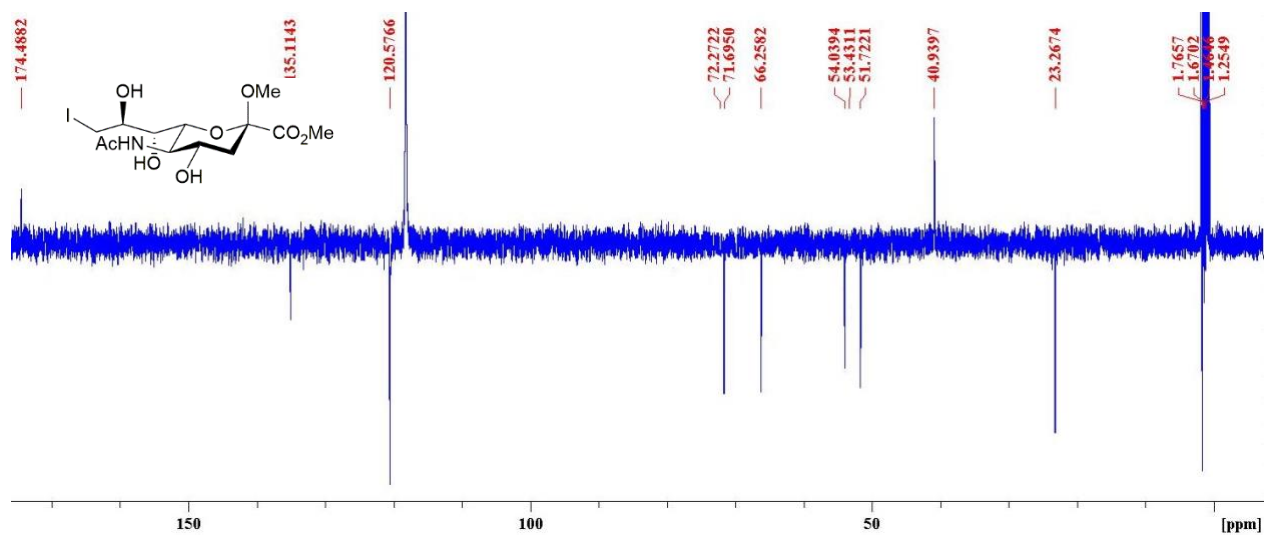

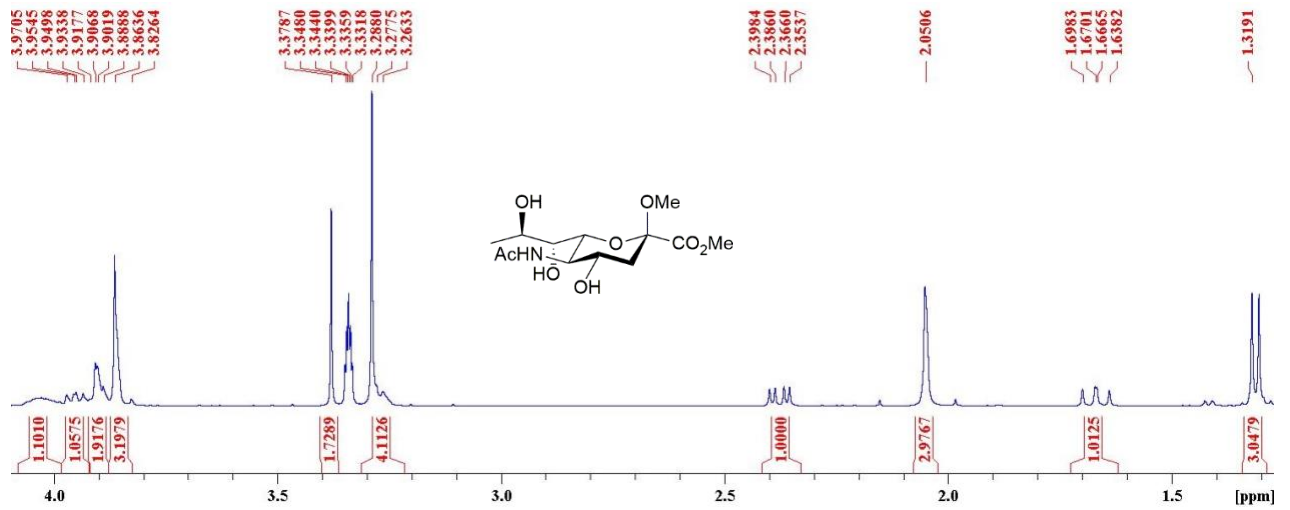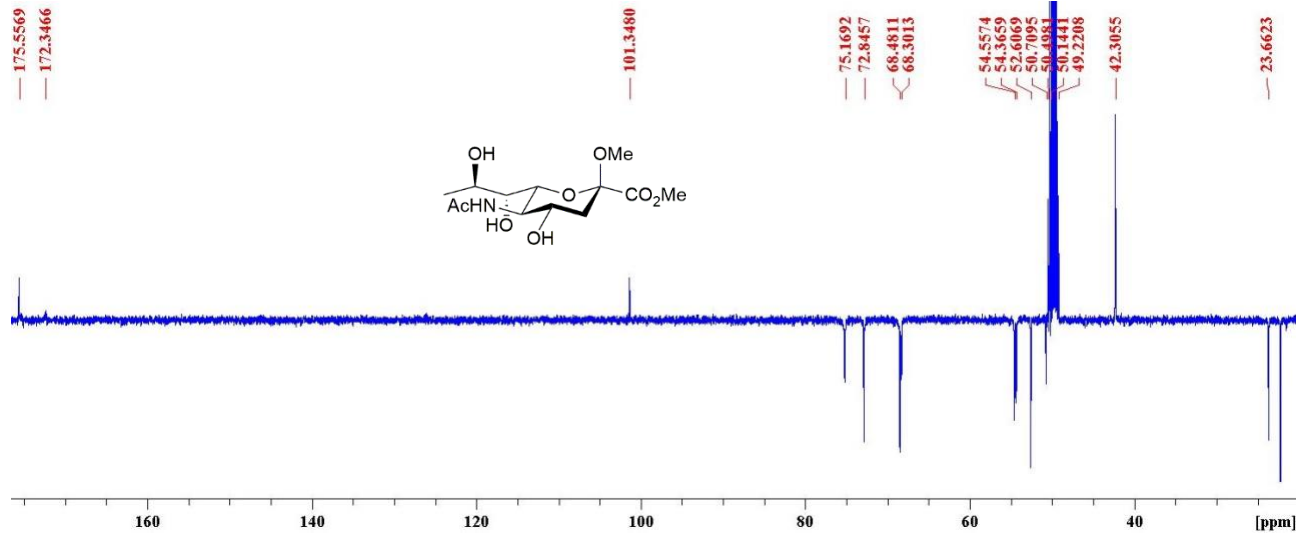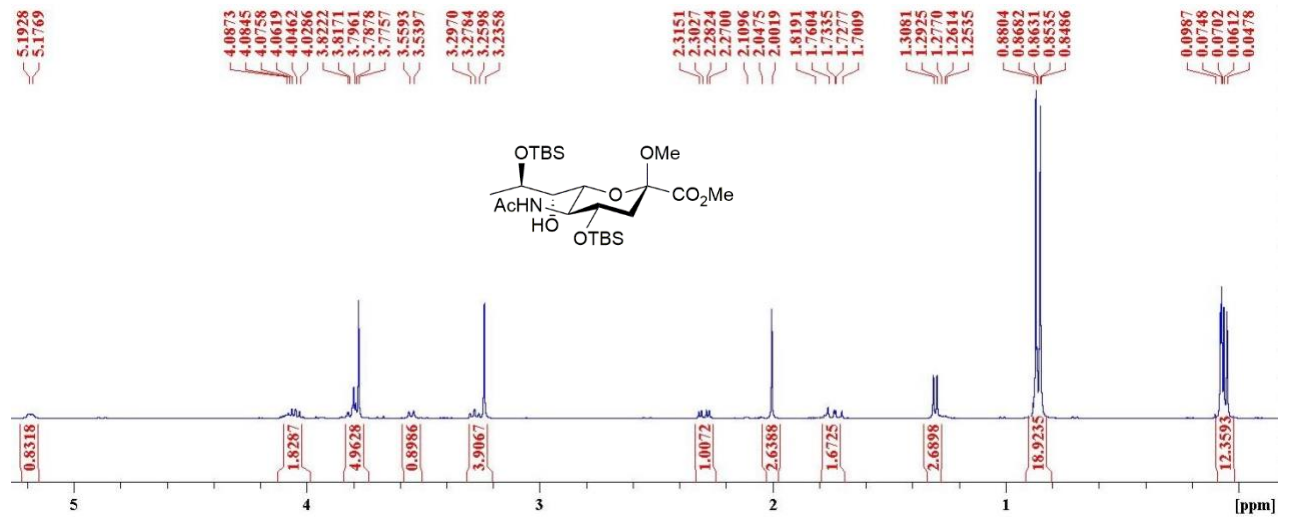

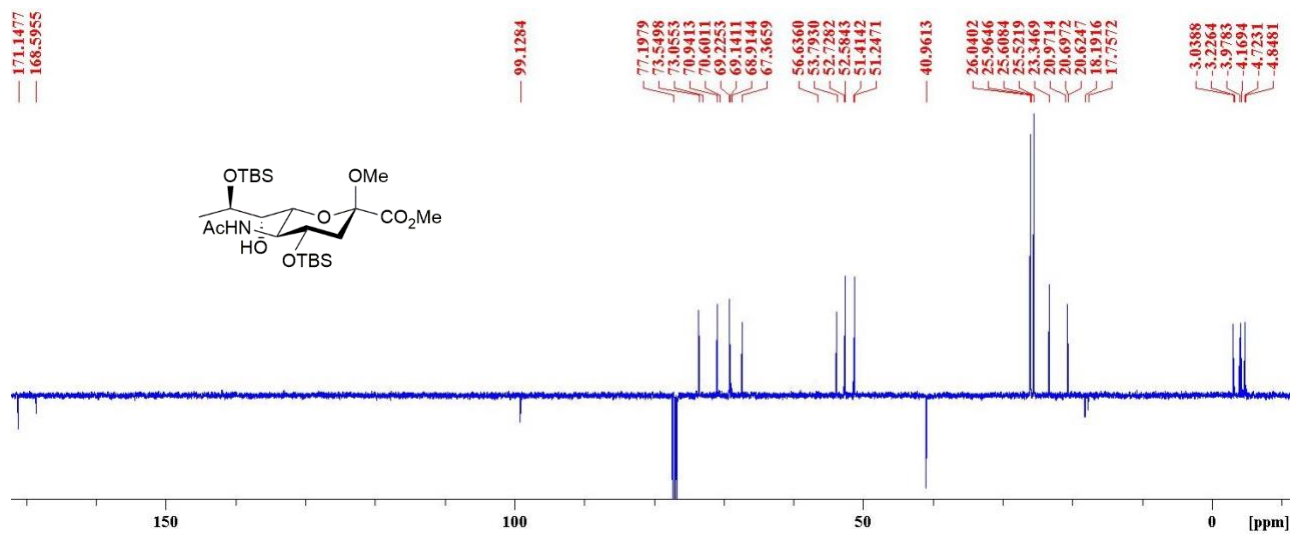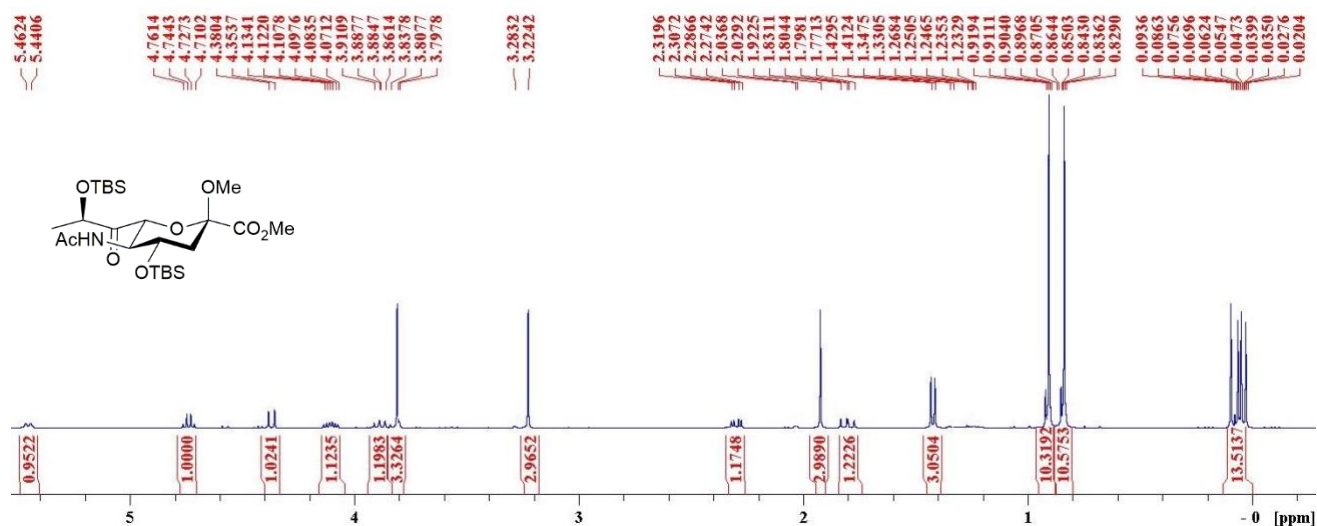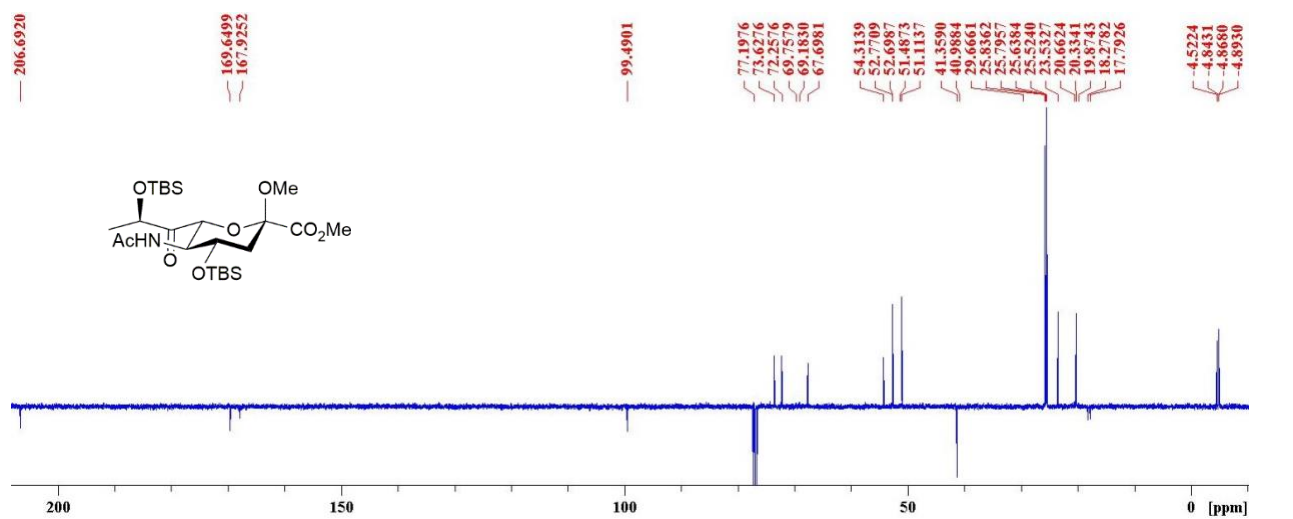

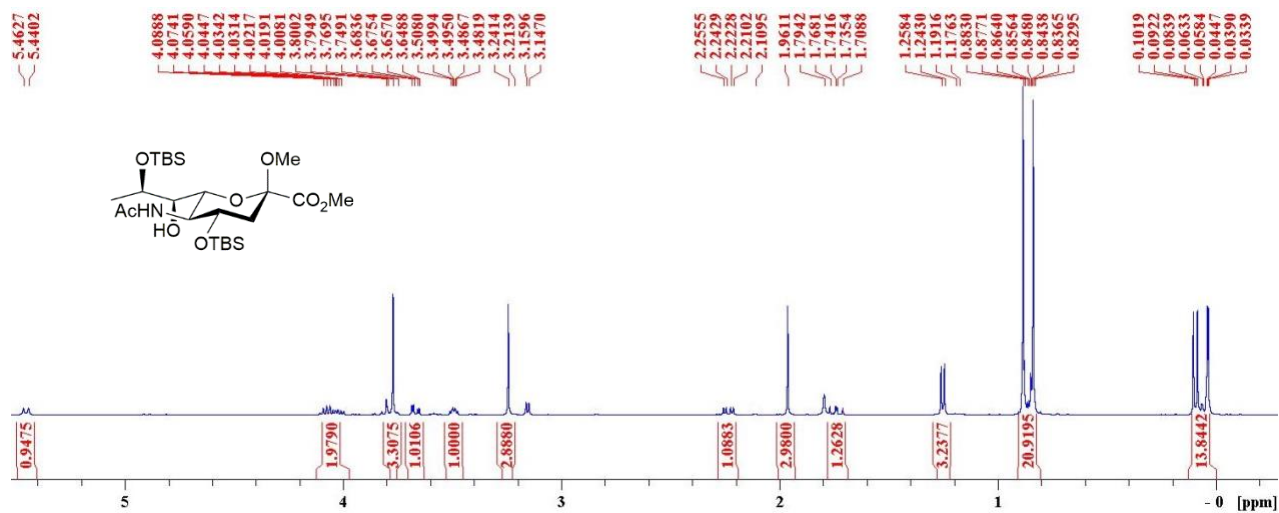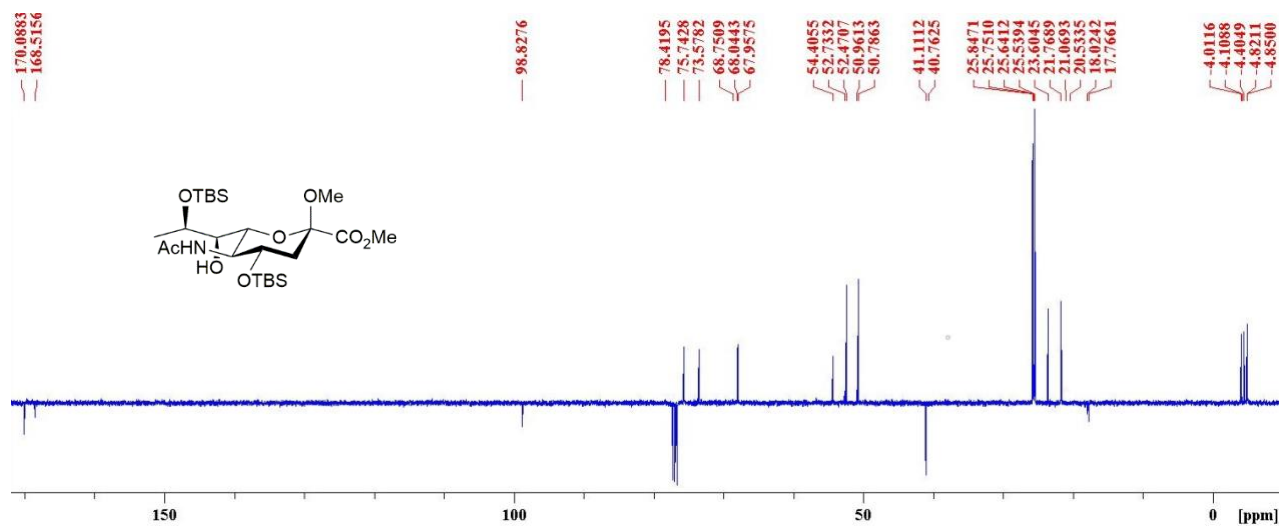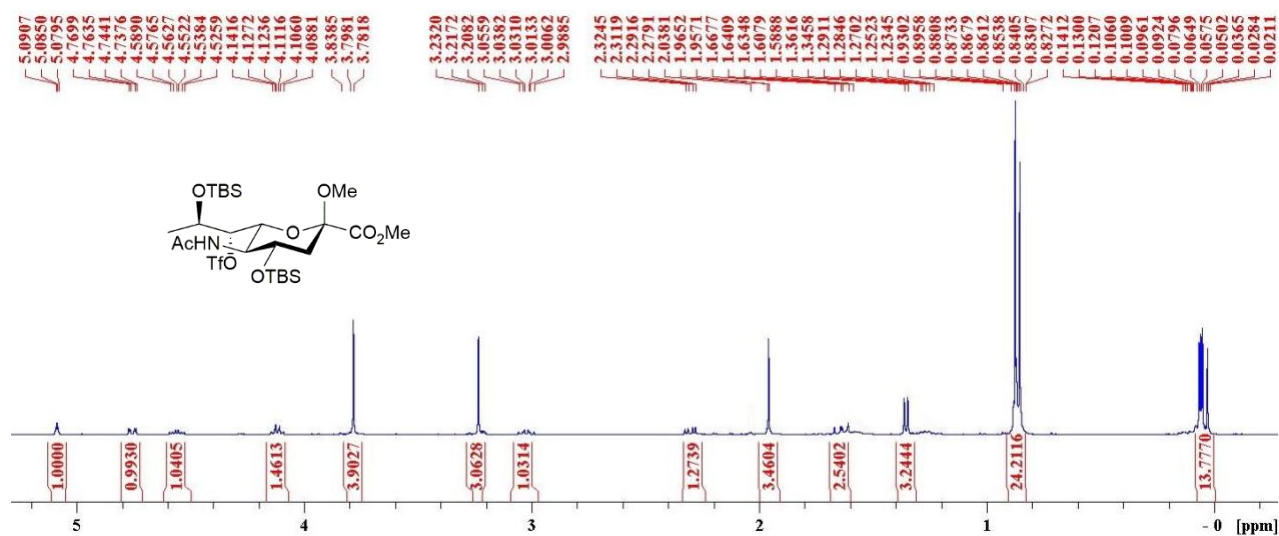

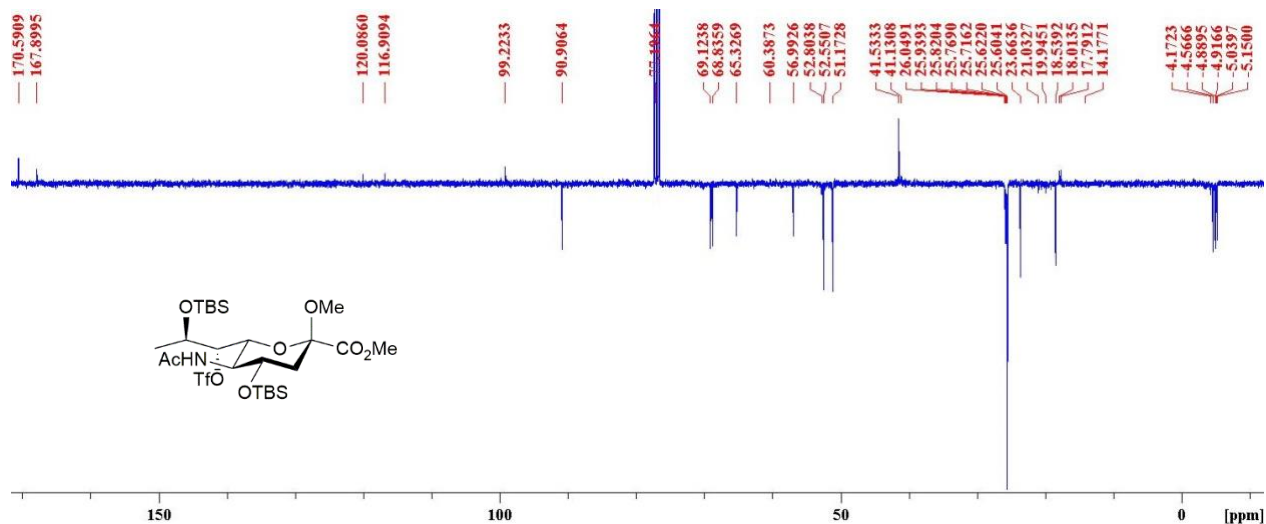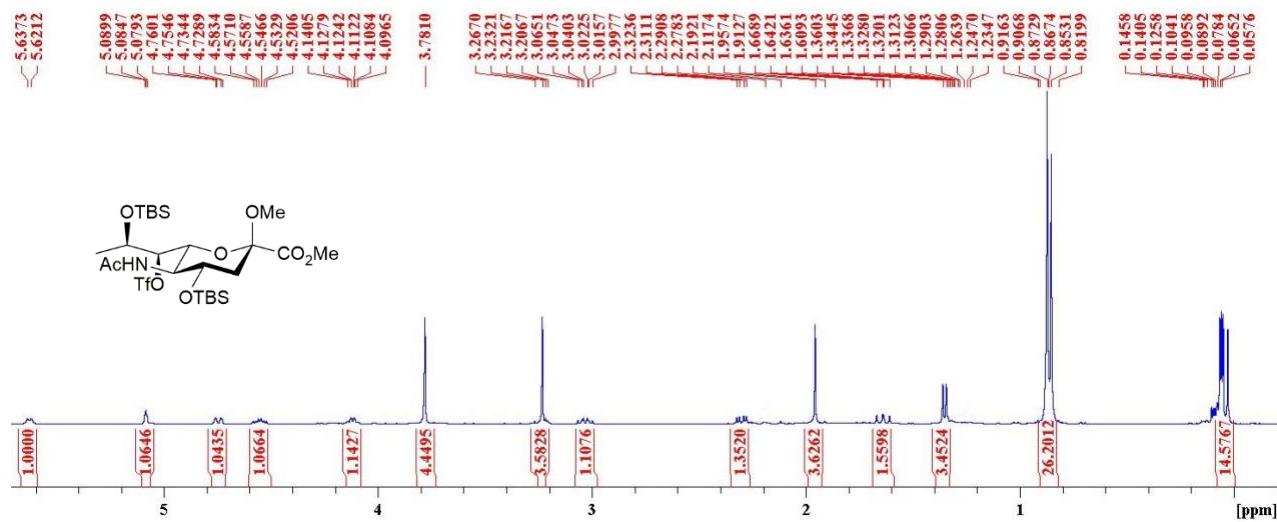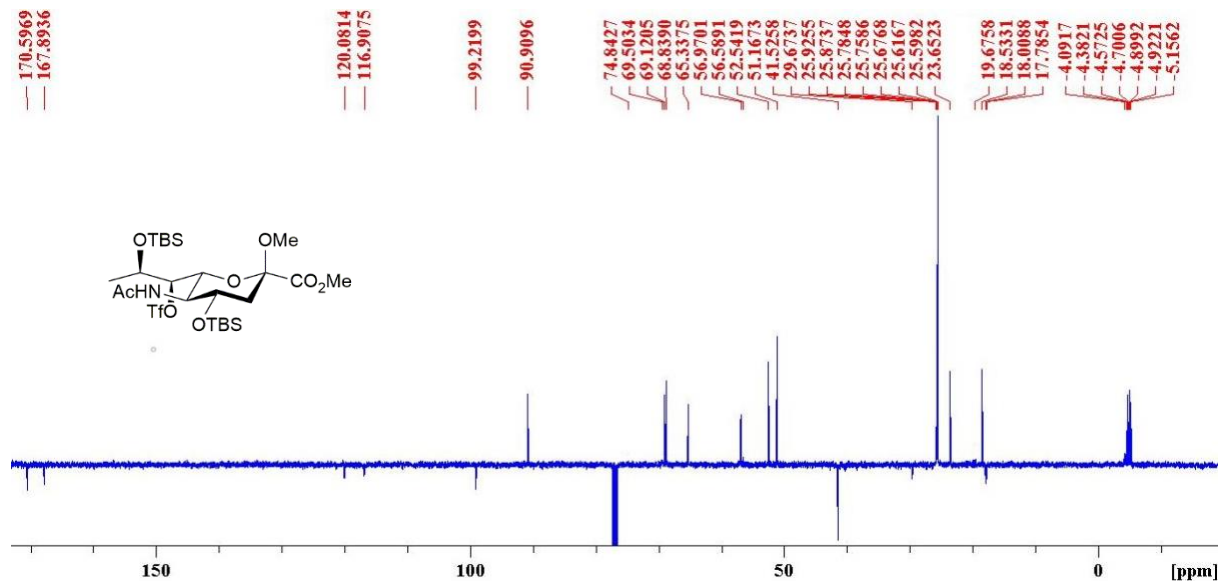

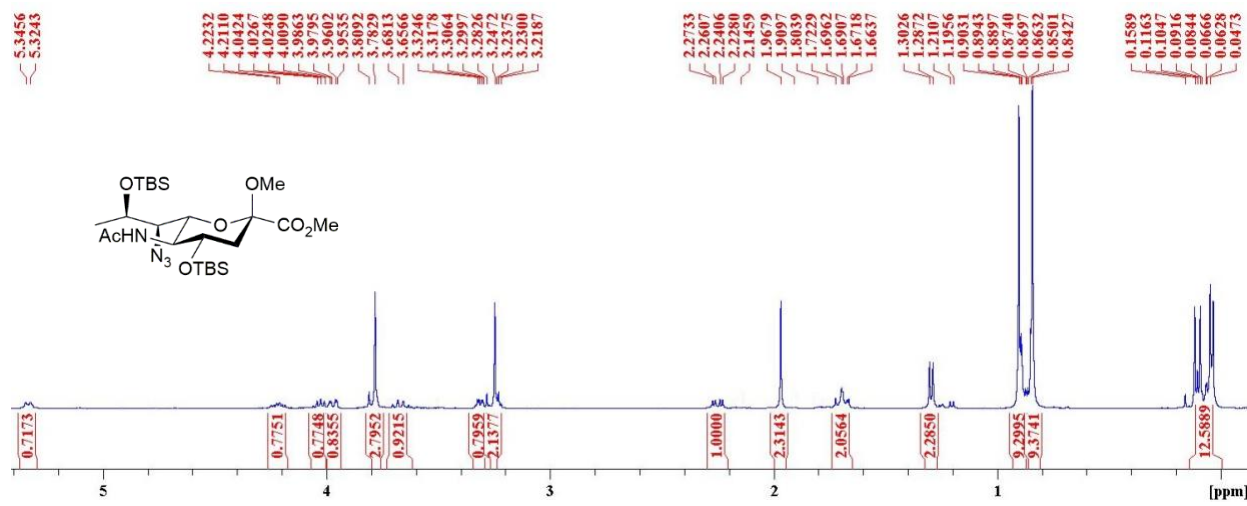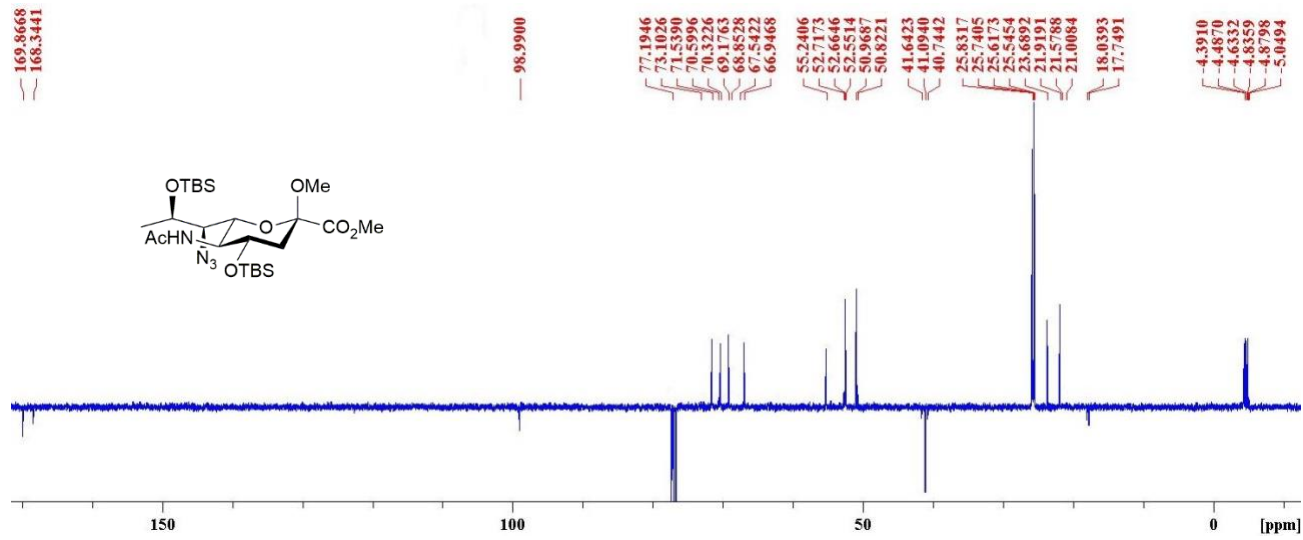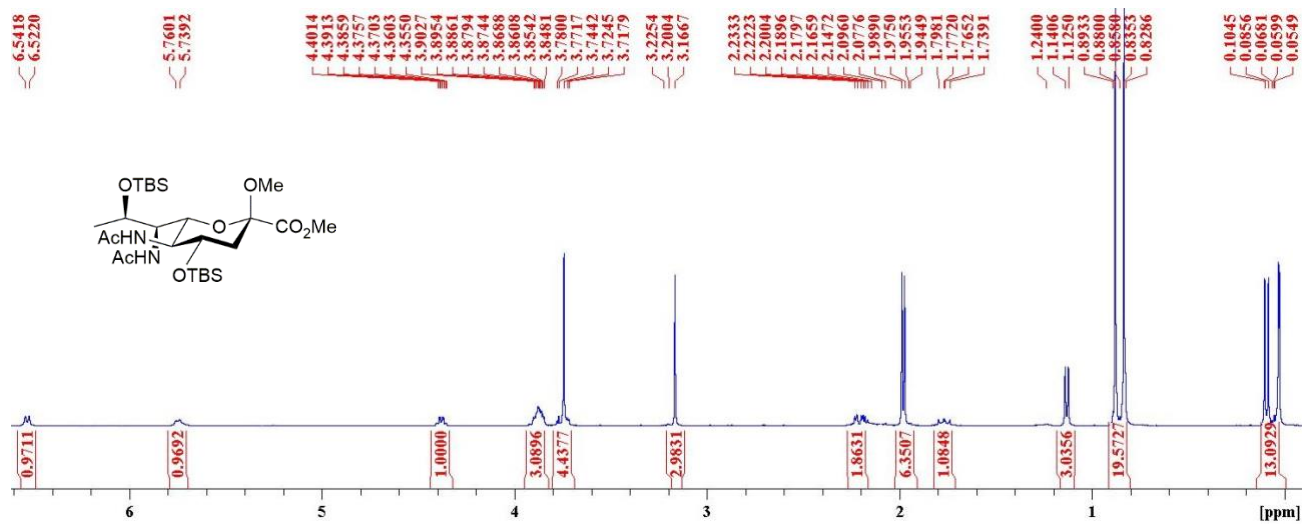

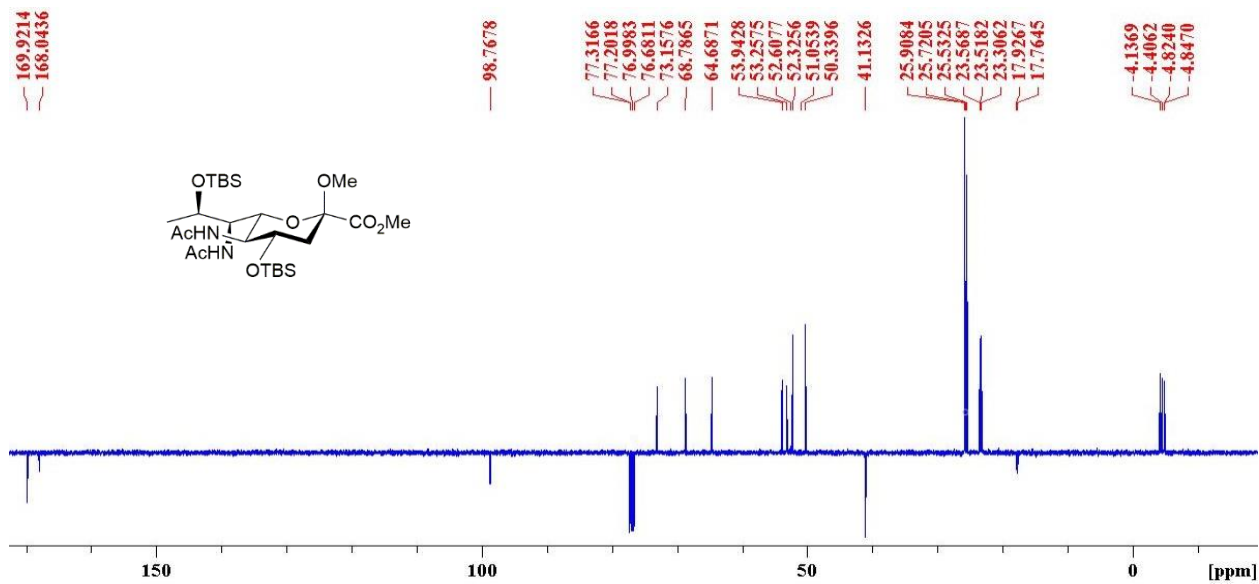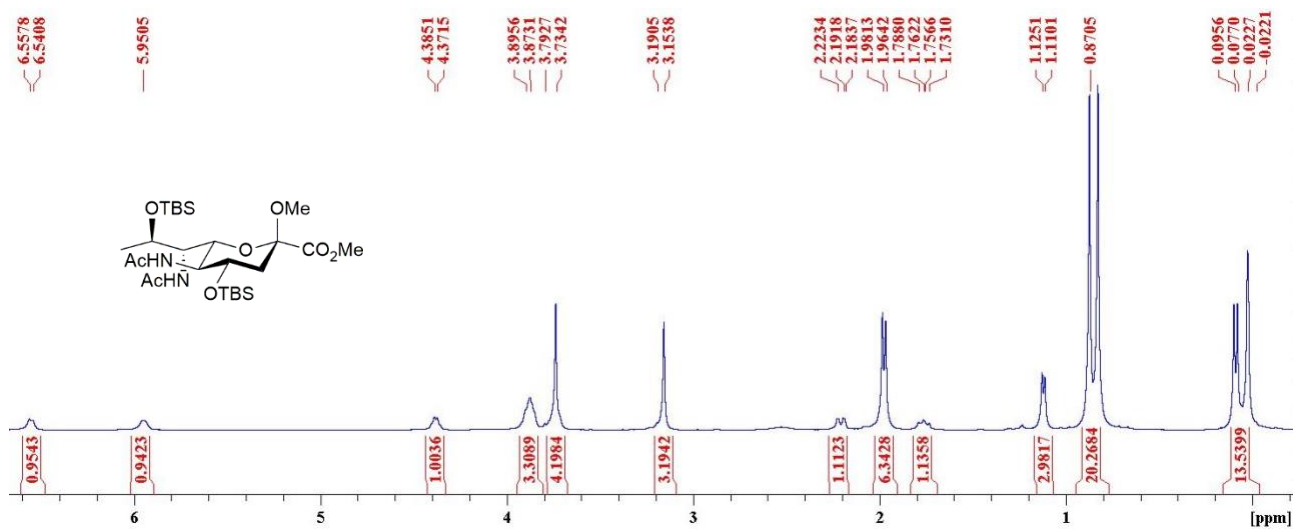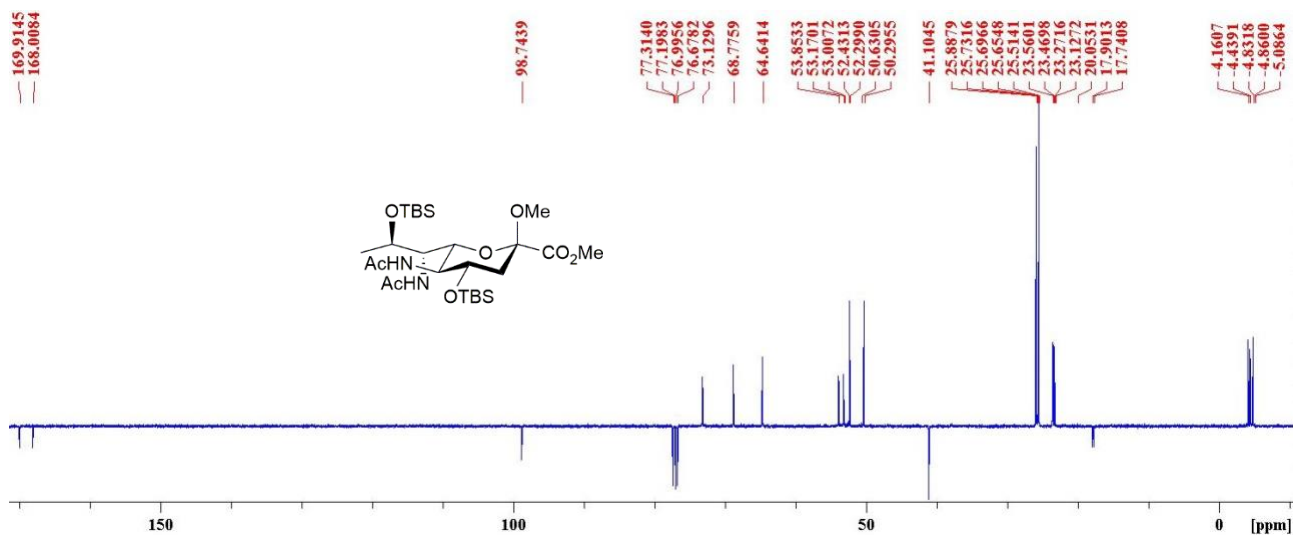

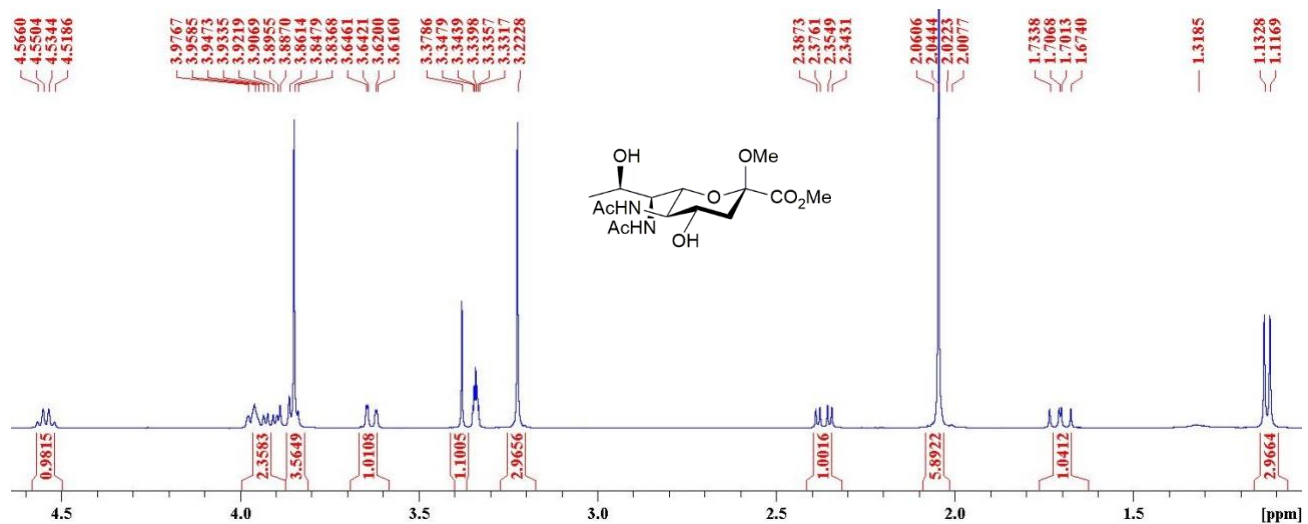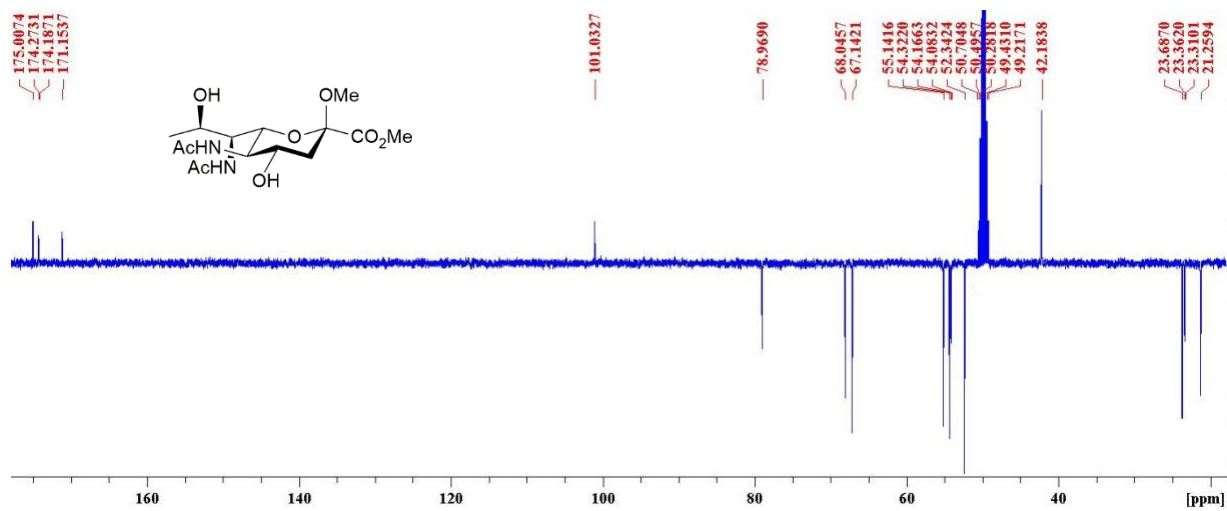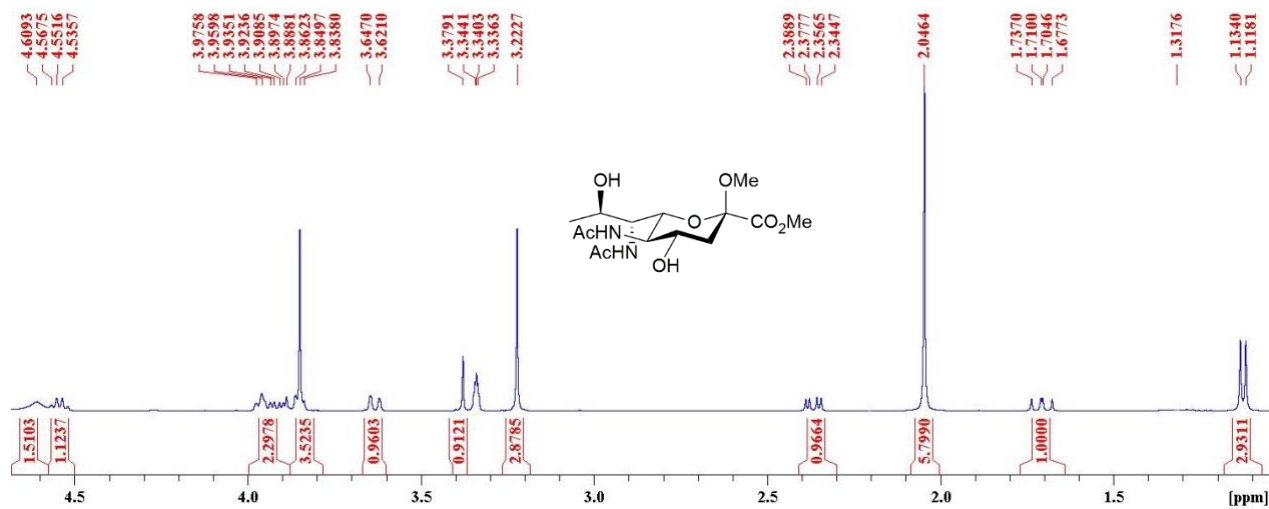



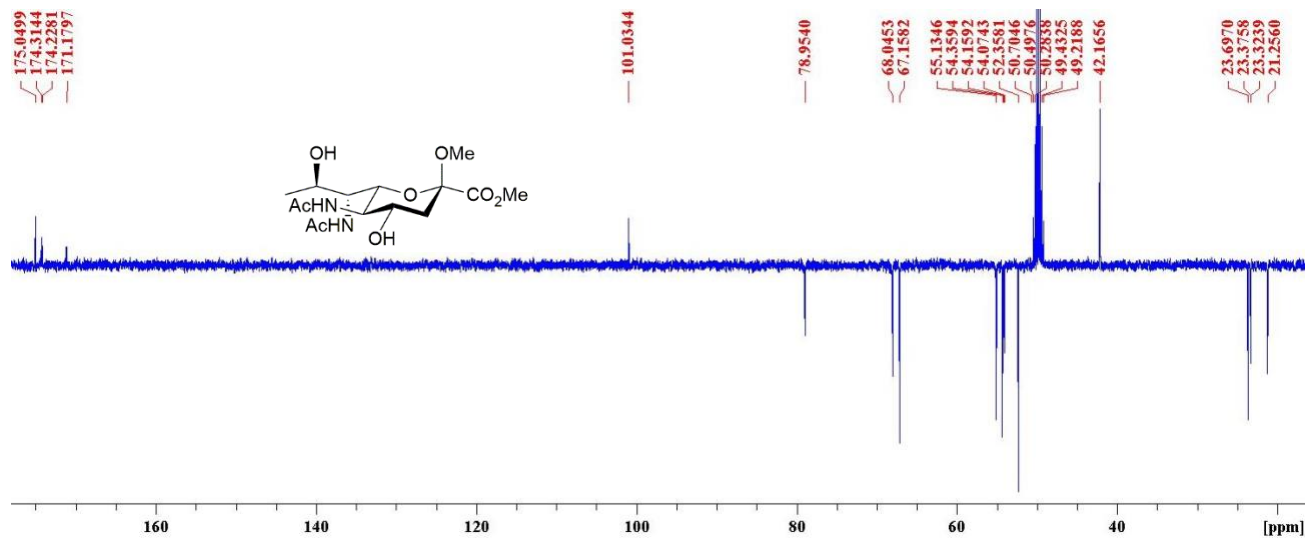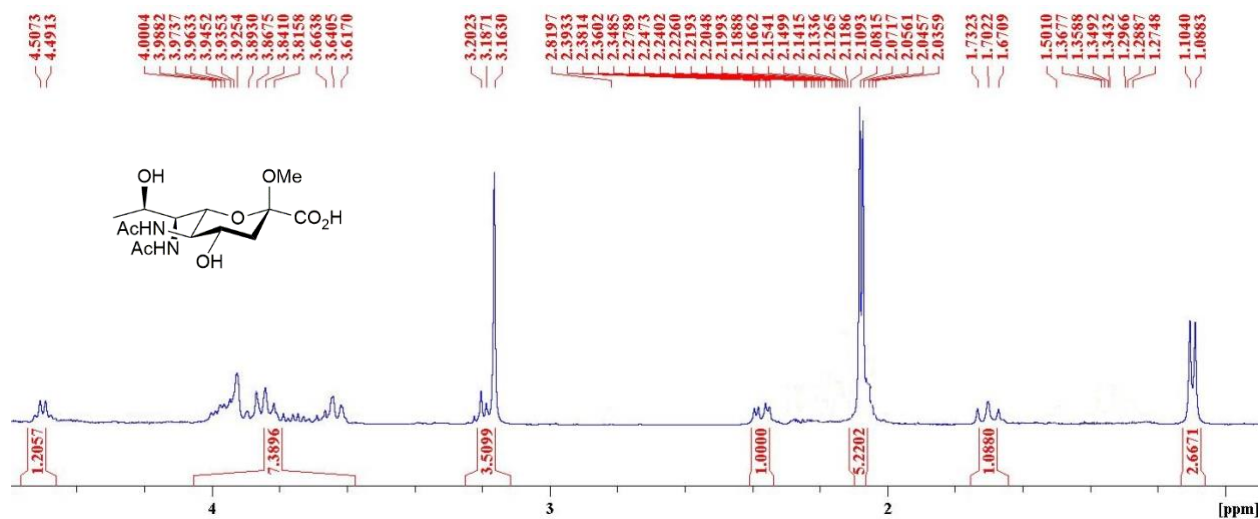

Supplement: c8ra07771a1.pdf [file c8ra07771a1.pdf]
